# Supplementary material
Source: PubMed Central journal article supplement (PMC3661704)
Supplement: NIHMS451085-supplement-1.pdf [file NIHMS451085-supplement-1.pdf]

## Supplementary Information

### Disulfide-Bond Scanning Reveals Assembly State and $\beta$ -Strand Tilt Angle of PFO $\beta$ -Barrel

Takehiro K. Sato, Rodney K. Tweten, and Arthur E. Johnson

#### Supplementary Results

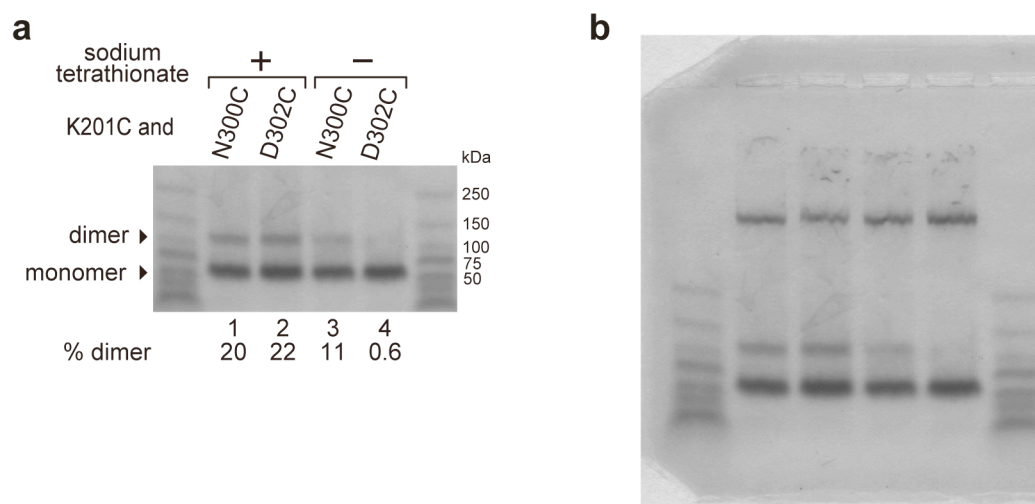

**Supplementary Figure 1. Residues 201 and 300 are juxtaposed in the PFO  $\beta$ -barrel, while 201 and 302 are only transiently proximal. (a)** An equimolar mixture of K201C and either N300C or D302C PFO derivatives were incubated for 40 min at 37°C to form pore complexes. Pore complexes were then purified and incubated either in the presence or absence of tetrathionate. Disulfide-linked dimers were analyzed by SDS-AGE, and the % yield of dimer is indicated below the lanes. **(b)** Entire gel from which panel **a** was excised.

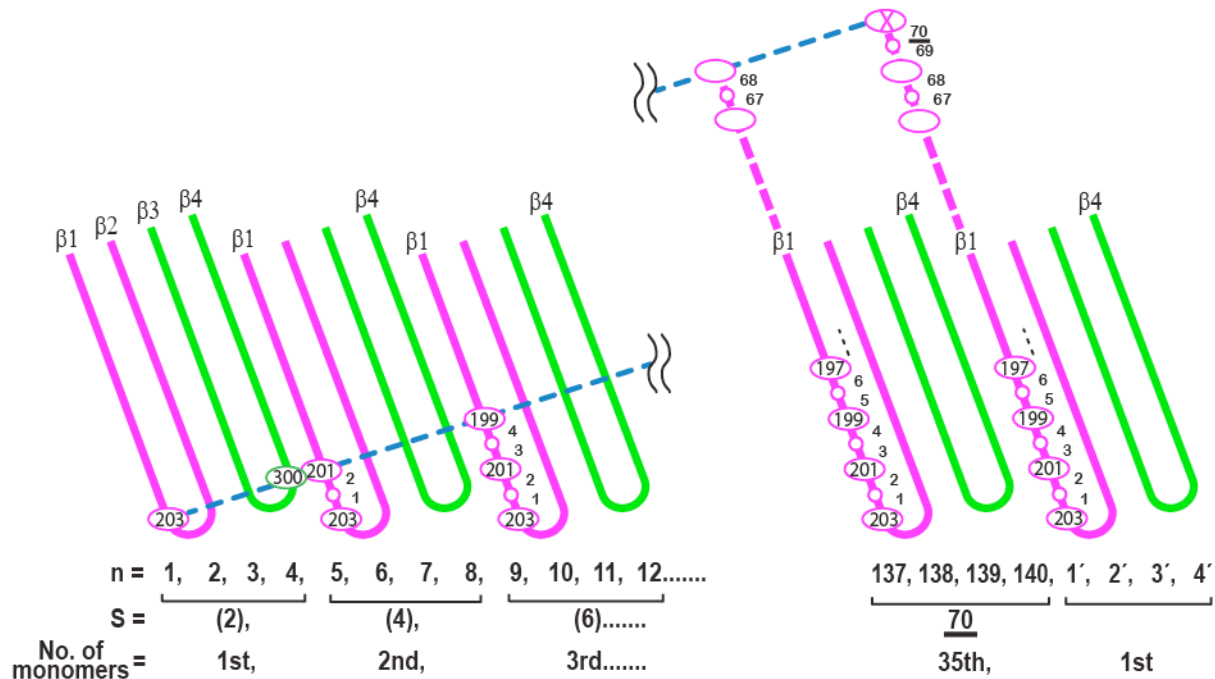

**Supplementary Figure 2. Parameters of PFO  $\beta$ -barrel structure.** A PFO  $\beta$ -barrel consists of  $\sim 35$  PFO monomers, each of which inserts two TMHs (one shown in magenta, the other in green) into the bilayer and hence contributes four  $\beta$ -strands to the  $\beta$ -barrel. The total number of  $\beta$ -strands ( $n$ ) in the PFO  $\beta$ -barrel is therefore 140. These strands are depicted above as an unfolded  $\beta$ -sheet in the plane of the paper. The  $\beta 1$  strand of the leftmost hairpin in the figure is defined to be  $n = 1$ ;  $\beta 1$  in the next monomer to the right is therefore  $n = 5$ , and so on. The shear number ( $S$ ) is defined as the total number of residues that are offset in circling the  $\beta$ -barrel once and returning to the starting strand<sup>10</sup>. The number of offset residues can be determined by extending a line (blue dashes) perpendicularly from residue 203 in the first strand ( $n = 1$ ) until it returns to the first strand ( $n = 1'$ ).  $S$  is the stagger (number of offset residues) from residue 203 in  $n = 1$  to the termination point, X, at the completion of one turn around the  $\beta$ -barrel. For PFO,  $S = 70$  (underlined) when  $n = 140$ . The  $S/n$  ratio is therefore  $1/2$  since the offset is two residues per PFO monomer (4  $\beta$ -strands) in the large PFO  $\beta$ -barrel.

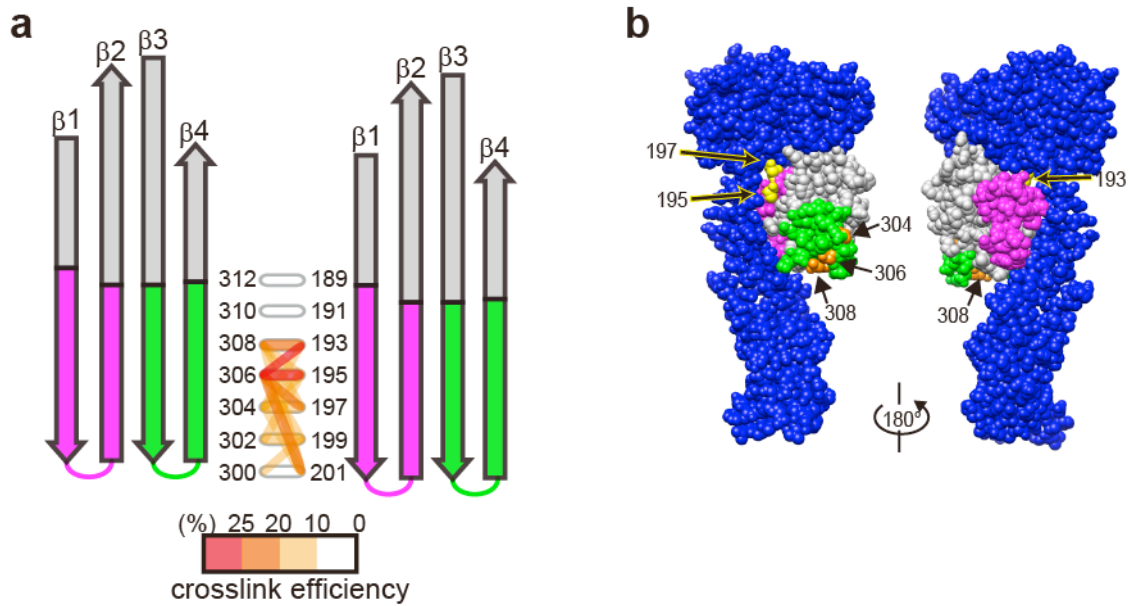

**Supplementary Figure 3.  $\beta$ 4- $\beta$ 1 cross-linking in PPCs.** (a) Crosslink efficiencies for each pair of  $\beta$ 1 and  $\beta$ 4 residues in PPCs are indicated by the color of the lines linking the two residues. (b) The locations of the TMH residues that are frequently disulfide-linked in the PPC are shown in space-filling representations of monomeric PFO rotated 180° relative to each other. Images were generated using Chimera.

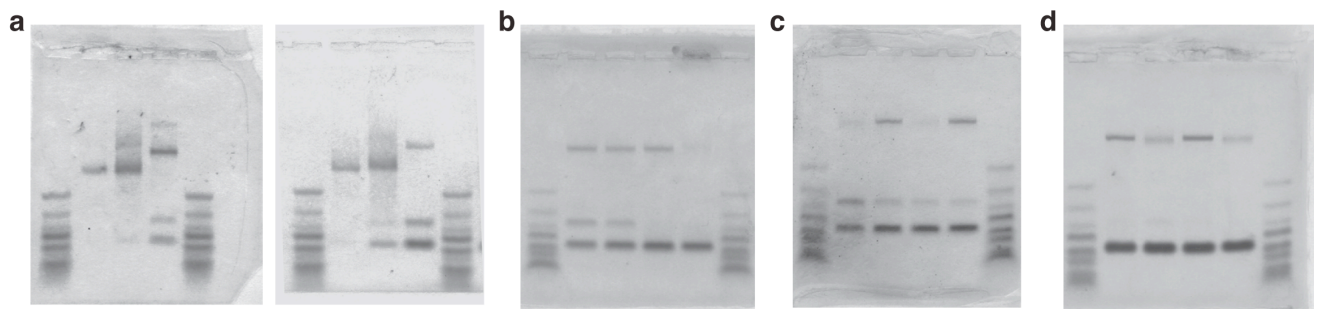

**Supplementary Figure 4. Detection of disulfide-bonded PFO dimers in PPC and pore complexes.** The whole gels from which the corresponding panels of Figure 2 were derived.

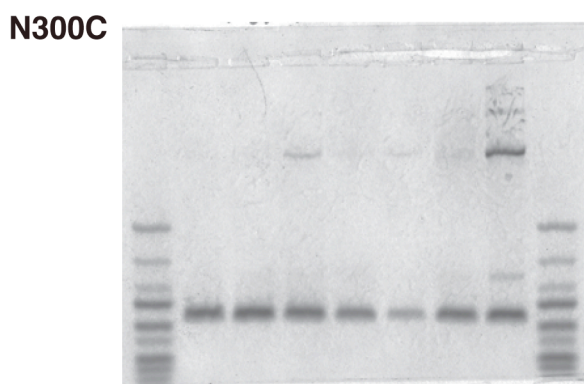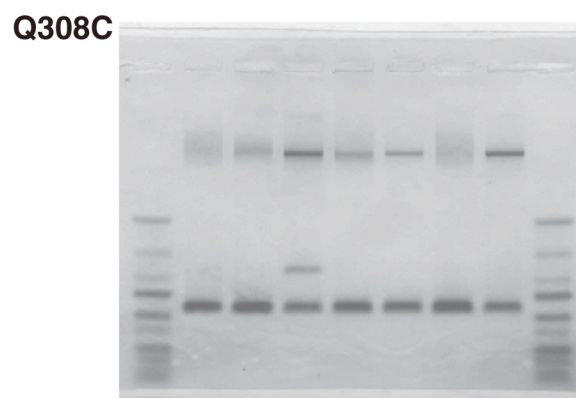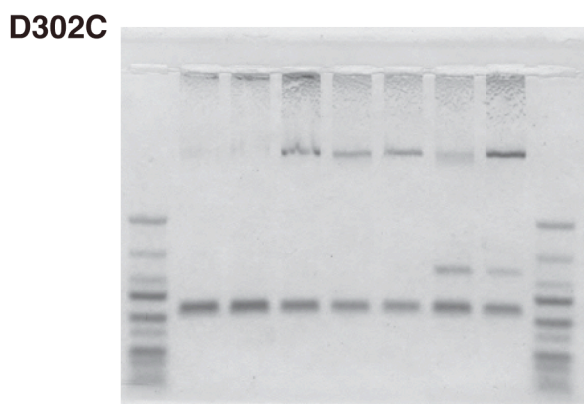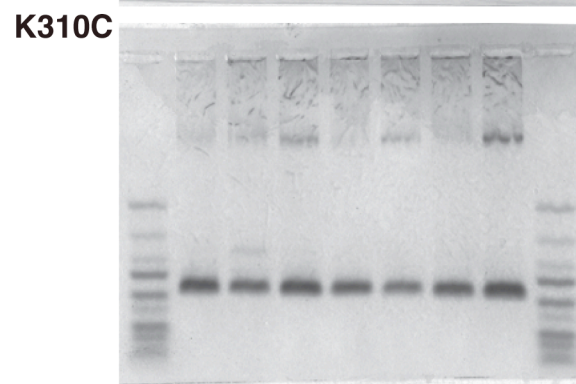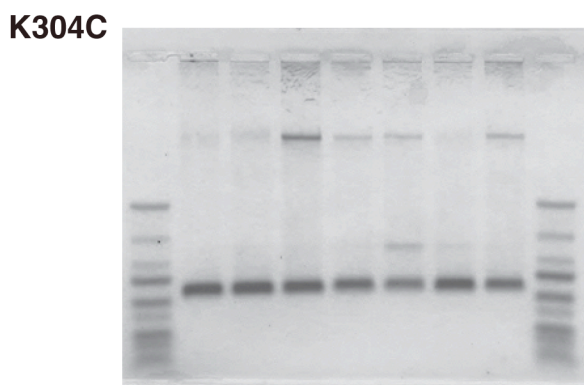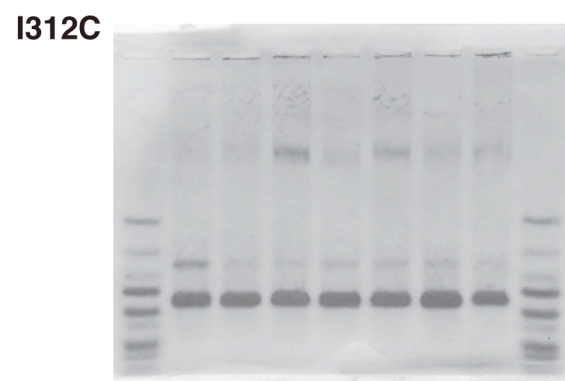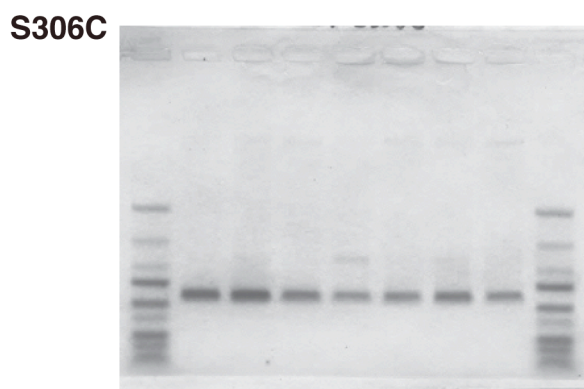

**Supplementary Figure 5.  $\beta$ 4- $\beta$ 1 crosslinking in pore complex** The whole gels from which the corresponding panels of Figure 3a were derived.



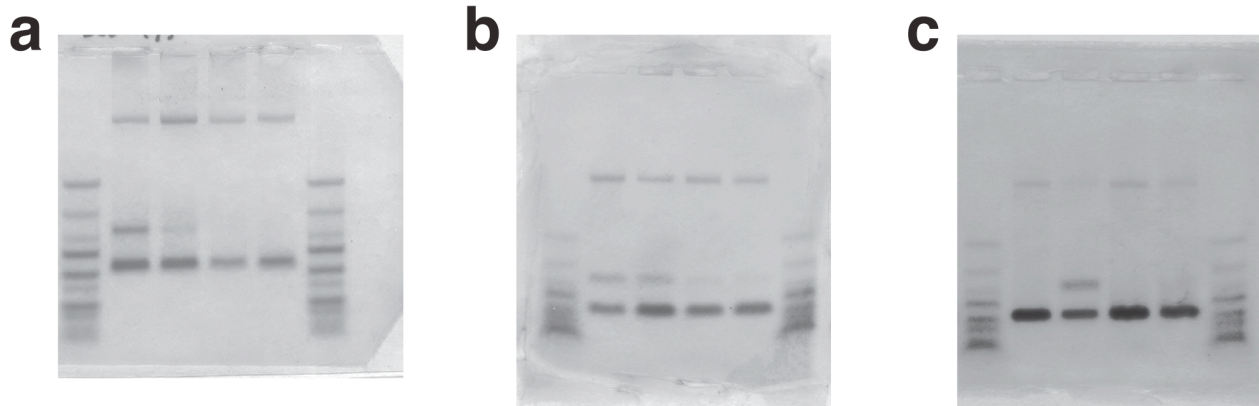

**Supplementary Figure 6. Dimer formation in PPCs.** The whole gels from which the panels of Figures 4a, 4b, and 4c were derived.

N300C

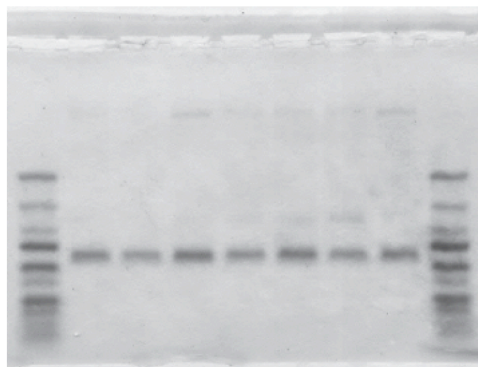

Q308C

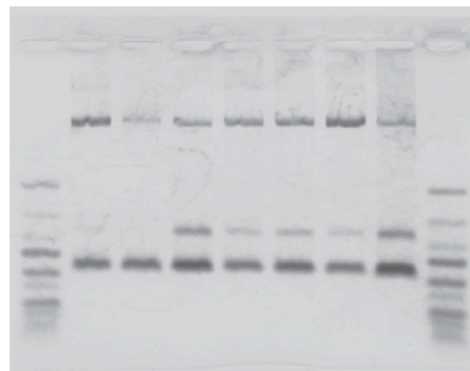

D302C

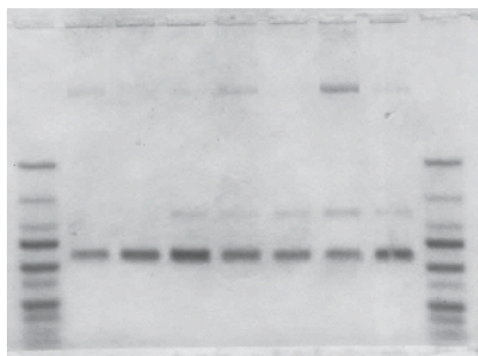

K310C

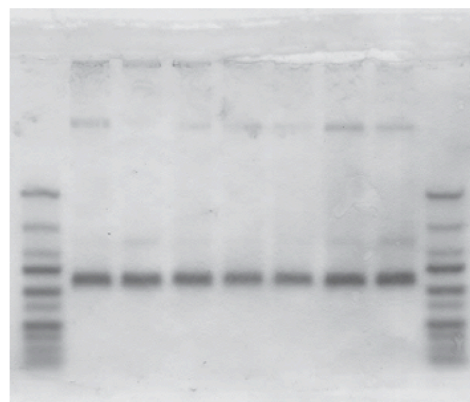

K304C

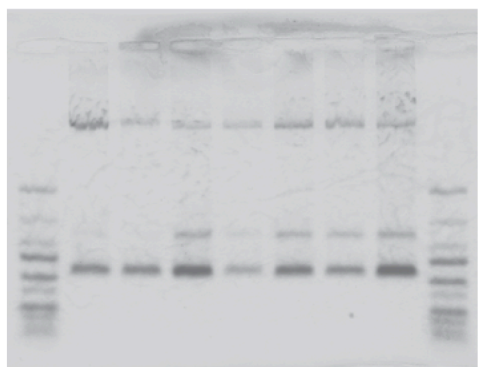

I312C

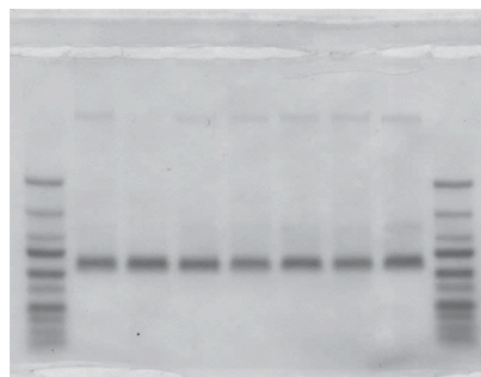

S306C

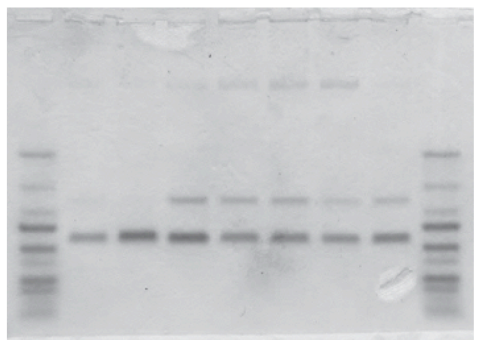

**Supplementary Figure 7.  $\beta$ 4- $\beta$ 1 crosslinking in prepore complexes.** The whole gels from which the corresponding panels of Figure 4d were derived.

| Domain | Cleavage site | PFO C459A MW = 56.8 kDa   |                           | TMH locations |
|--------|---------------|---------------------------|---------------------------|---------------|
|        |               | C-terminal fragment (kDa) | N-terminal fragment (kDa) |               |
| D1     | 34            | 52.1                      | 4.7                       |               |
| D1     | 49            | 50.5                      | 6.3                       |               |
| D2     | 59            | 49.4                      | 7.4                       |               |
| D2     | 66            | 48.6                      | 8.2                       |               |
| D2     | 69            | 48.3                      | 8.5                       |               |
| D2     | 70            | 48.2                      | 8.6                       |               |
| D2     | 74            | 47.8                      | 9                         |               |
| D2     | 80            | 47.1                      | 9.7                       |               |
| D2     | 82            | 46.8                      | 10                        |               |
| D1     | 101           | 44.8                      | 12                        |               |
| D1     | 113           | 43.6                      | 13.2                      |               |
| D1     | 125           | 42.1                      | 14.7                      |               |
| D1     | 126           | 42                        | 14.8                      |               |
| D1     | 139           | 40.5                      | 16.3                      |               |
| D1     | 145           | 40                        | 16.8                      |               |
| D1     | 153           | 39                        | 17.8                      |               |
| D1     | 164           | 37.9                      | 18.9                      |               |
| D1     | 168           | 37.4                      | 19.4                      |               |
| D1     | 178           | 36.3                      | 20.5                      |               |
| D3     | 189           | 34.9                      | 21.9                      | TMH1          |
| D3     | 201           | 33.7                      | 23.1                      | TMH1          |
| D3     | 219           | 31.8                      | 25                        |               |
| D3     | 220           | 31.7                      | 25.1                      |               |
| D3     | 227           | 30.9                      | 25.9                      |               |
| D1     | 239           | 29.5                      | 27.3                      |               |
| D1     | 255           | 27.7                      | 29.1                      |               |
| D1     | 257           | 27.5                      | 29.3                      |               |
| D3     | 275           | 25.6                      | 31.2                      |               |
| D3     | 280           | 25                        | 31.8                      |               |
| D3     | 288           | 24.1                      | 32.7                      | TMH2          |
| D3     | 295           | 23.4                      | 33.4                      | TMH2          |
| D3     | 299           | 23                        | 33.8                      | TMH2          |
| D3     | 304           | 22.4                      | 34.4                      | TMH2          |
| D3     | 300           | 21.6                      | 35.2                      | TMH2          |
| D3     | 332           | 19.3                      | 37.5                      |               |
| D3     | 336           | 18.6                      | 38.2                      |               |
| D3     | 342           | 18.1                      | 38.7                      |               |
| D3     | 343           | 18                        | 38.8                      |               |
| D3     | 346           | 17.6                      | 39.2                      |               |
| D1     | 354           | 16.7                      | 40.1                      |               |
| D1     | 368           | 15.1                      | 41.7                      |               |
| D2     | 378           | 14.1                      | 42.7                      |               |
| D4     | 391           | 12.6                      | 44.2                      |               |
| D4     | 393           | 12.4                      | 44.4                      |               |
| D4     | 417           | 9.7                       | 47.1                      |               |

**Supplementary Table 1. Trypsin cleavage sites in PFO.** PPC TMHs are unfolded, flexible, and moving, while the TMHs in monomers are tightly folded in helices and the TMHs in pore complexes form the  $\beta$ -barrel that is embedded in the membrane. Limited protease digestion may therefore detect PPC-specific cleavages in the PFO polypeptide. Trypsin was chosen because PFO contains 45 Lys and Arg residues, with 2 in TMH1 and 5 in TMH2. Single cleavages in either TMH would yield peptides of 22-24 kDa and 33-35 kDa, but we expected TMHs in the membrane-embedded pores would not be cleaved.

trypsin : rPFO = 12 : 1 (trypsin 300  $\mu\text{g/ml}$ ) at 4°C

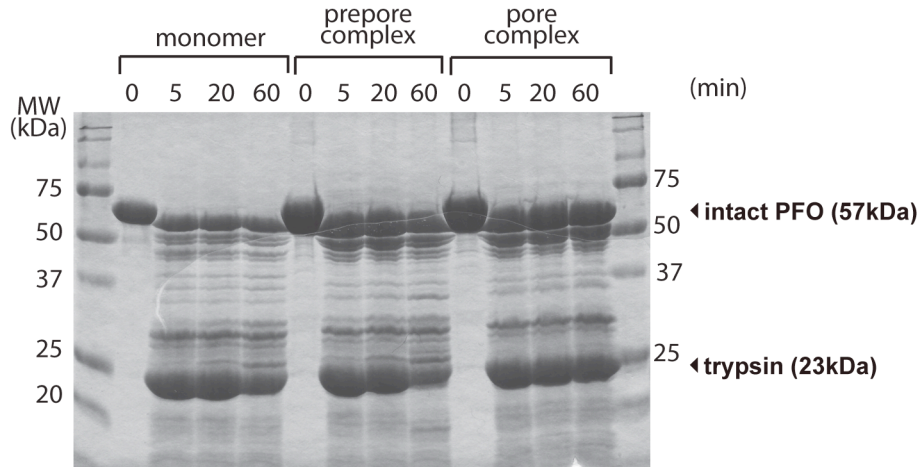

trypsin digestion for 30min at 4°C

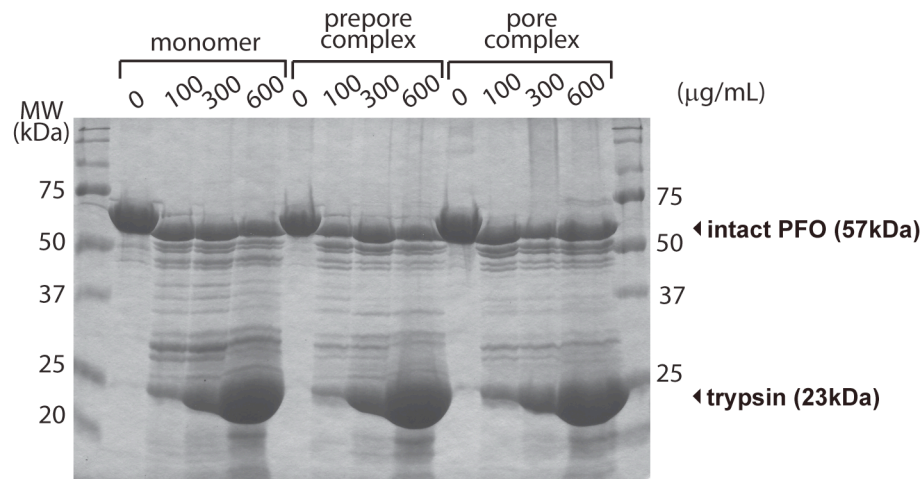

**Supplementary Figure 8. Trypsin digestion of PPCs, monomers, and membrane-embedded pore complexes.** PFO monomers, PPCs, and pore complexes were exposed to trypsin under the same conditions while the concentration of trypsin and the time of digestion were varied systematically. A few proteolytic fragments near the size expected for TMH cleavage were present in the monomer and PPC gels, but missing in the pore complex gels, as expected. However, we did not observe any proteolytic fragments that were unique to the



PPC (this was also true when the gels were run for shorter times and we examined peptides <20 kDa). It therefore appears that the partially unfolded and moving TMHs on the inside of the circular PPC oligomer are not sufficiently accessible for trypsin cleavage to yield a trypsin fragment that differs from those observed in monomers. Thus, this approach was not very promising for detecting TMH conformations unique to the PPC.
